# Supplementary material for: Proof of Concept of Culturomics Use of Time of Care
Source: Front Cell Infect Microbiol. 2020 Nov 23;10:524769. doi: 10.3389/fcimb.2020.524769 (PMC7719802; doi:10.3389/fcimb.2020.524769)
Supplement: Supplementary file 3 [file Table_3.xlsx]

## Sheet: Supplementary Table 3
Sample 1 with Fast culturomics	Strictly anaerobic	O2 Tolerant		Megagut with Fast culturomics	Strictly anaerobic	O2 Tolerant		Megagut with standard culturomics	Strictly anaerobic	O2 Tolerant
Alistipes ihuae	1	0		Acidaminococcus intestini	1	0		Acidaminococcus intestini	1	0
Alistipes jeddahensis	1	0		Adlercreutzia equolifaciens	1	0		Alistipes finegoldii	1	0
Alistipes massiliensis	1	0		Akkermansia muciniphila	1	0		Alistipes indistinctus	1	0
Alistipes merdae	1	0		Alistipes finegoldii	1	0		Alistipes jeddahensis	1	0
Alistipes obesi	1	0		Alistipes ihuae	1	0		Alistipes massiliensis	1	0
Alistipes putredinis	1	0		Alistipes indistinctus	1	0		Alistipes obesi	1	0
Alistipes senegalensis	1	0		Alistipes jeddahensis	1	0		Alistipes obesihominis	1	0
Alistipes shahii	1	0		Alistipes obesi	1	0		Alistipes onderdonkii	1	0
Allisonella histaminiformans	1	0		Alistipes onderdonkii	1	0		Alistipes putredinis	1	0
Anaeroglobus geminatus	1	0		Alistipes putredinis	1	0		Alistipes shahii	1	0
Anaeromassilibacillus timonensis	1	0		Alistipes senegalensis	1	0		Anaerococcus murdochii	1	0
Anaerotruncus rubinfantis	1	0		Alistipes shahii	1	0		Anaerococcus vaginalis	1	0
Bacteroides caccae	1	0		Anaerococcus prevotii	1	0		Anaerosalibacter bizertensis	1	0
Bacteroides coprocola	1	0		Anaerotruncus massiliensis	1	0		Anaerotruncus colihominis	1	0
Bacteroides cutis	1	0		Atopobium minutum	1	0		Arabia massiliensis	1	0
Bacteroides eggerthii	1	0		Atopobium rimae	1	0		Arcanobacterium urinomassiliense	0	1
Bacteroides faecis	1	0		Bacteroides caccae	1	0		Atopobium minutum	1	0
Bacteroides massiliensis	1	0		Bacteroides faecis	1	0		Bacillus cereus	0	1
Bacteroides ovatus	1	0		Bacteroides fragilis	1	0		Bacillus thuringiensis	0	1
Bacteroides plebeius	1	0		Bacteroides intestinalis	1	0		Bacillus weihenstephanensis	0	1
Bacteroides salyersiae	1	0		Bacteroides ovatus	1	0		Bacteroides caccae	1	0
Bacteroides stercoris	1	0		Bacteroides thetaiotaomicron	1	0		Bacteroides cellulosilyticus	1	0
Bacteroides uniformis	1	0		Bacteroides uniformis	1	0		Bacteroides intestinalis	1	0
Bacteroides vulgatus	1	0		Bacteroides vulgatus	1	0		Bacteroides massiliensis	1	0
Barnesiella intestinihominis	1	0		Barnesiella intestinihominis	1	0		Bacteroides nordii	1	0
Beduinibacterium massiliense	1	0		Beduinibacterium massiliense	1	0		Bacteroides ovatus	1	0
Bifidobacterium adolescentis	0	1		Bifidobacterium bifidum	0	1		Bacteroides salyersiae	1	0
Bifidobacterium catenulatum	0	1		Bifidobacterium longum	0	1		Bacteroides thetaiotaomicron	1	0
Bifidobacterium longum	0	1		Bittarella massiliensis	1	0		Bacteroides uniformis	1	0
Bifidobacterium pseudocatenulatum	0	1		Blautia ihumii	1	0		Bacteroides vulgatus	1	0
Bittarella massiliensis	1	0		Blautia massiliensis	1	0		Barnesiella intestinihominis	1	0
Blautia hydrogenotrophica	1	0		Blautia mediterraneensis	1	0		Bifidobacterium adolescentis	0	1
Blautia massiliensis	1	0		Blautia phoceensis	1	0		Bifidobacterium bifidum	0	1
Blautia mediterraneensis	1	0		Blautia timonensis	1	0		Bifidobacterium catenulatum	0	1
Blautia phoceensis	1	0		Butyricimonas duongiae	1	0		Bifidobacterium longum	0	1
Blautia timonensis	1	0		Butyricimonas phoceensis	1	0		Bifidobacterium pseudocatenulatum	0	1
Christensenella minuta	1	0		Christensenella massiliensis	1	0		Bilophila wadsworthia	1	0
Clostridium aldenense	1	0		Christensenella minuta	1	0		Bittarella massiliensis	1	0
Intestinibacter bartlettii	1	0		Clostridium aldenense	1	0		Blautia hydrogenotrophica	1	0
Clostridium bifermentans	1	0		Clostridium bouchesdurhonense	1	0		Butyricimonas phoceensis	1	0
Clostridium bolteae	1	0		Clostridium butyricum	1	0		Butyricimonas virosa	1	0
Clostridium bouchesdurhonense	1	0		Clostridium citroniae	1	0		Campylobacter ureolyticus	1	0
Clostridium citroniae	1	0		Clostridium clostridioforme	1	0		Casaltella massiliensis	1	0
Clostridium clostridioforme	1	0		Clostridium frigidocagae	1	0		Catabacter hongkongensis	1	0
Clostridium innocuum	1	0		Clostridium innocuum	1	0		Christensenella minuta	1	0
Clostridium intestinalis	1	0		Clostridium lavalense	1	0		Citrobacter freundii	0	1
Clostridium lavalense	1	0		Clostridium merdae	1	0		Clostridium aminovalericum	1	0
Clostridium perfringens	1	0		Clostridium perfringens	1	0		Clostridium bifermentans	1	0
Clostridium phoceense	1	0		Clostridium phoceense	1	0		Clostridium clostridioforme	1	0
Clostridium scindens	1	0		Clostridium sordelli	1	0		Clostridium cochlearium	1	0
Clostridium sporogenes	1	0		Clostridium spiroforme	1	0		Clostridium glycyrrhizinilyticum	1	0
Clostridium symbiosium	1	0		Clostridium sporogenes	1	0		Clostridium hathewayi	1	0
Collinsella aerofaciens	1	0		Collinsella aerofaciens	1	0		Clostridium innocuum	1	0
Collinsella massiliensis	1	0		Collinsella massiliensis	1	0		Clostridium lavalense	1	0
Coprococcus comes	1	0		Collinsella spp.	1	0		Clostridium paraputrificum	1	0
Cutibacterium eggermontii	1	0		Coprococcus comes	1	0		Clostridium perfringens	1	0
Dialister propionicifaciens	1	0		Corynebacterium amycolatum	0	1		Clostridium sordelli	1	0
Dialister succinatiphilus	1	0		Cryptobacterium curtum	1	0		Clostridium sporogenes	1	0
Dorea longicatena	1	0		Cutibacterium eggermontii	1	0		Clostridium symbiosum	1	0
Dorea timonensis	1	0		Dialister invisus	1	0		Collinsella massiliensis	1	0
Drancourtella massiliensis	1	0		Dialister pneumosintes	1	0		Corynebacterium reamassiliensis	0	1
Dubourgella massiliensis	1	0		Dielma fastidiosa	1	0		Dialister invisus	1	0
Eggerthella lenta	1	0		Dorea longicatena	1	0		Dialister pneumosintes	1	0
Eggerthella timonensis	1	0		Dorea timonensis	1	0		Dielma fastidiosa	1	0
Enterococcus durans	0	1		Drancourtella massiliensis	1	0		Eggerthella lenta	1	0
Enterococcus faecalis	0	1		Eggerthella lenta	1	0		Enterobacter cloacae	0	1
Enterococcus faecium	0	1		Eisenbergiella massiliensis	1	0		Enterococcus avium	0	1
Escherichia coli	0	1		Enorma timonensis	1	0		Enterococcus casseliflavus	0	1
Eubacterium rectale	1	0		Enterococcus faecium	0	1		Enterococcus durans	0	1
Faecalibacterium prausnitzii	1	0		Enterococcus hirae	0	1		Enterococcus faecalis	0	1
Fenollaria vaginalis	1	0		Escherichia coli	0	1		Enterococcus faecium	0	1
Flavonifractor plautii	1	0		Eubacterium coli	1	0		Enterococcus gallinarum	0	1
Fusicatenibacter saccharivorans	1	0		Eubacterium limosum	1	0		Enterococcus hirae	0	1
Gordonibacter pamelae	1	0		Eubacterium massiliense	1	0		Enterococcus malodoratus	0	1
Guyana massiliensis	1	0		Facklamia longuida	1	0		Enterococcus massiliensis	0	1
Holdemania timonensis	1	0		Fenollaria vaginalis	1	0		Escherichia coli	0	1
Holdemanella biformis	1	0		Roseburia faecis	1	0		Eubacterium limosum	1	0
Jeddahella massiliensis	1	0		Flavonifractor plautii	1	0		Facklamia hominis	1	0
Kytococcus sedentarius	1	0		Fusicatenibacter saccharivorans	1	0		Flavonifractor plautii	1	0
Lachnoclostridium edouardi	1	0		Gabonia massiliensis	1	0		Gordonibacter pamelaeae	1	0
Lachnoclostridium timonense	1	0		Guyana massiliensis	1	0		Holdemania timonensis	1	0
Lactobacillus paracasei	0	1		Ihubacter massiliensis	1	0		Intestinimonas massiliensis	1	0
Lactobacillus plantarum	0	1		Ihuella massiliensis	1	0		Klebsiella oxytoca	0	1
Lactobacillus reuteri	0	1		Infusionema cagae	1	0		Klebsiella pneumoniae	0	1
Lactobacillus rhamnosus	0	1		Intestinibacillus timonensis	1	0		Lactobacillus acidipiscis	0	1
Lactobacillus ruminis	0	1		Intestinibacter bartlettii	1	0		Lactobacillus caccae*	0	1
Marseillibacter massiliensis	1	0		Lachnoclostridium edouardi	1	0		Lactobacillus delbrueckii	0	1
Merdibacter timonensis	1	0		Lachnoclostridium ihumii	1	0		Lactobacillus fermentum	0	1
Neochristensenella massiliensis	1	0		Lachnoclostridium timonense	1	0		Lactobacillus paracasei	0	1
Odoribacter splanchnicus	1	0		Lachnoclostridium pacaense	1	0		Lactobacillus plantarum	0	1
Olsenella timonensis	1	0		Lactobacillus fuchuensis	0	1		Lactococcus lactis	0	1
Olsenella uli	1	0		Lactobacillus paracasei	0	1		Lagierella massiliensis	1	0
Oscilibacter massiliensis	1	0		Lactobacillus reuteri	0	1		Lysinibacillus boronitolerans	0	1
Oscilibacter mediterraneensis	1	0		Lactobacillus rhamnosus	0	1		Lysinibacillus fusiformis	0	1
Parabacteroides distasonis	1	0		Lactococcus lactis	0	1		Massiliomicrobiota timonensis	1	0
Parabacteroides gordonii	1	0		Merdibacter massiliensis	1	0		Mediannikovella massiliensis	1	0
Parabacteroides merdae	1	0		Mobilibacterium massiliense	1	0		Metaprevotella massiliensis	1	0
Paraoscilibacter massiliensis	1	0		Mobilibacterium timonense	1	0		Micromassilia timonensis	0	1
Paraprevotella clara	1	0		Moryella indoligenes	1	0		Micromassilia vaginalis	0	1
Parasutterella excrementihominis	1	0		Odoribacter splanchnicus	1	0		Mobilibacterium timonensis	1	0
Phocibacillus massiliensis	1	0		Olegusella massiliensis	1	0		Moryella indoligenes	1	0
Phoenicibacter massiliensis	1	0		Olsenella timonensis	1	0		Murdochiella massiliensis	1	0
Polynesia massiliensis	1	0		Olsenella urinainfantis	1	0		Neisseria macacae	0	1
Prevotella massiliensis	1	0		Oscilibacter massiliensis	1	0		Odoribacter splanchnicus	1	0
Propionibacterium acnes	1	0		Parabacteroides distasonis	1	0		Olsenella timonensis	1	0
Pseudoramibacter alactolyticus	1	0		Parabacteroides merdae	1	0		Olsenella uli	1	0
Roseburia faecis	1	0		Peptoniphilus grossensis	1	0		Olsenella urinainfantis	1	0
Roseburia inulinivorans	1	0		Peptoniphilus lacrimalis	1	0		Oscillibacter massiliensis	1	0
Rubneribacter badeniensis	1	0		Peptoniphilus obesi	1	0		Paenibacillus barengoltzii	1	0
Ruminococcus bicirculans	1	0		Peptoniphilus raoultii	1	0		Parabacteroides distasonis	1	0
Ruminococcus faecis	1	0		Phascolarctobacterium faecium	1	0		Parabacteroides johnsonii	1	0
Ruminococcus gnavus	1	0		Polynesia massiliensis	1	0		Parabacteroides merdae	1	0
Ruminococcus timonensis	1	0		Prevotella corporis	1	0		Parasutterella excrementihominis	0	1
Senegalimassilia anaerobia	1	0		Propionibacterium acnes	1	0		Pediococcus acidilactici	0	1
Slackia exigua	1	0		Pseudoclavibacter alba	1	0		Peptococcus niger	0	1
Slackia isoflavoniconvertens	1	0		Pseudomonas oryzihabitans	1	0		Peptoniphilus grossensis	1	0
Staphylococcus cohnii	0	1		Raoultibacter massiliensis	1	0		Peptoniphilus harei	1	0
Streptococcus agalactiae	0	1		Roseburia hominis	1	0		Peptoniphilus lacrimalis	1	0
Streptococcus parasanguinis	0	1		Roseburia inulinivorans	1	0		Peptoniphilus obesi	1	0
Streptococcus salivarius	0	1		Ruminococcus bicirculans	1	0		Peptoniphilus obesihominis	1	0
Total	103	17		Ruminococcus faecis	1	0		Peptoniphilus phoceensis	1	0
				Senegalimassilia anaerobia	1	0		Peptoniphilus timonensis	1	0
				Slackia exigua	1	0		Peptostreptococcus anaerobius	0	1
				Slackia isoflavoniconvertens	1	0		Phascolarctobacterium faecium	1	0
				Staphylococcus epidermidis	0	1		Polynesia massiliensis	1	0
				Streptococcus pleomorphus	0	1		Propionibacterium acnes	1	0
				Streptococcus salivarius	0	1		Provencella massiliensis	0	1
				Streptococcus sanguinis	0	1		Raoultibacter massiliensis	1	0
				Sutterella wadsworthensis	0	1		Staphylococcus epidermidis	0	1
				Sutturella seckii	0	1		Staphylococcus kloosii	0	1
				Togobacter massiliensis	1	0		Staphylococcus warneri	0	1
				Total	114	17		Streptococcus anginosus	0	1
								Streptococcus australis	0	1
Supplementary Table 3. We have listed strict anaerobic and aerotolerant bacterial species in different stool samples.								Streptococcus constellatus	0	1
1 : Presence of bacterial species								Streptococcus infantarius	0	1
0 : Absence of bacterial species								Streptococcus lutetiensis	0	1
*New species identified by sequencing								Streptococcus pleomorphus	0	1
								Streptococcus sanguinis	0	1
								Sutterella wadsworthensis	0	1
								Varibaculum cambriense	1	0
								Veillonella parvula	1	0
								Virgibacillus proomii	0	1
								Weissella paramesenteroides	1	0
								Total	90	53
